# Supplementary material
Source: publisher figshare collection journal article supplement (https://gsajournals.figshare.com/ndownloader/files/14384552)
Supplement: Supplementary file 1 [file 14384552]

**Genomic prediction of autotetraploids; influence of relationship matrices, allele dosage, and continuous genotyping calls in phenotype prediction**

Ivone de Bem Oliveira*, †, Marcio F. R. Resende Jr.‡, Luis Felipe V. Ferrão*, Rodrigo R. Amadeu*, Jeffrey B. Endelman§, Matias Kirst††, Alexandre S. G. Coelho†, and Patricio R. Munoz*

*Blueberry Breeding and Genomics Lab, Horticultural Sciences Department, University of Florida, Gainesville, FL, USA, 32611

†Plant Genetics and Genomics Lab, Agronomy College, Federal University of Goias, GO, Brazil, 74690-900

‡Sweet Corn Genomics and Breeding, Horticultural Sciences Department, University of Florida, Gainesville, FL, USA, 32611

§Department of Horticulture, University of Wisconsin, Madison, WI, USA, 53706

††Forest Genomics Lab, School of Forestry Resources and Conservation, University of Florida, Gainesville, FL, USA, 32610

**Corresponding author:**

Patricio Ricardo Muñoz (p.munoz@ufl.edu)

**Table S1.** Predictive ability, mean square error, goodness-of-fit and slope (beta) for eight yield and fruit-related traits analyzed with six linear mixed models with different dosage parameterizations of the relationship matrices. Source of information, and dosage parameterizations for the relationship matrices indicated by the letters (*I*, *A*, or *G*), and numbers (*2* or *4*), respectivelya

| **Trait** | **Relationship matrix** | **Predictive ability 2014** | **Predictive ability 2015** | **MSE (2014)** | **MSE (2015)** | **Goodness-of-fit** | **Betab** |
| --- | --- | --- | --- | --- | --- | --- | --- |
| Soluble Solid (°Brix) | *I* | 0.235 a | - | 5.795 a | - | 6539.326 d | 0.820 |
| *A2* | 0.290 a | - | 4.926 a | - | 6679.028 b | 0.854 |
| *A4* | 0.290 a | - | 4.531 a | - | 6677.926 b | 0.842 |
| *G2* | 0.277 a | - | 2.238 a | - | 6660.451 c | 0.831 |
| *G4* | 0.281 a | - | 2.197 a | - | 6675.855 b | 0.831 |
| *Gr* | 0.274 a | - | 2.216 a | - | 6705.259 a | 0.819 |
| Flower Buds | *I* | - | 0.152 a | - | 9.261 a | 8652.663 d | 0.643 |
| *A2* | - | 0.203 a | - | 8.280 a | 8832.708 b | 0.693 |
| *A4* | - | 0.199 a | - | 8.039 a | 8831.973 b | 0.707 |
| *G2* | - | 0.187 a | - | 11.469 a | 8813.498 c | 0.673 |
| *G4* | - | 0.182 a | - | 11.718 a | 8841.355 ab | 0.656 |
| *Gr* | - | 0.181 a | - | 11.860 a | 8854.885 a | 0.645 |
| Fruit Diameter | *I* | 0.38 a | 0.333 a | 8.827 a | 8.918 a | 17602.478 ab | 0.969 |
| *A2* | 0.396 a | 0.340 a | 8.072 a | 8.638 a | 17572.15 ab | 0.942 |
| *A4* | 0.386 a | 0.345 a | 9.134 a | 3.409 a | 17571.554 ab | 0.931 |
| *G2* | 0.403 a | 0.383 a | 19.796 a | 6.339 a | 17548.998 b | 0.996 |
| *G4* | 0.432 a | 0.377 a | 19.423 a | 6.484 a | 17579.596 ab | 0.983 |
| *Gr* | 0.432 a | 0.376 a | 19.718 a | 7.241 a | 17635.981 a | 0.969 |
| Fruit Firmness | *I* | 0.302 b | 0.425 a | 2725.511 a | 1109.026 a | 33951.819 a | 0.996 |
| *A2* | 0.372 ab | 0.490 a | 2146.811 a | 734.108 a | 33877.711 c | 0.957 |
| *A4* | 0.375 ab | 0.486 a | 778.212 a | 1490.294 a | 33887.371 bc | 0.954 |
| *G2* | 0.415 a | 0.505 a | 1240.152 a | 2083.417 a | 33838.951 c | 0.988 |
| *G4* | 0.426 a | 0.507 a | 1245.192 a | 2085.359 a | 33863.149 c | 0.971 |
| *Gr* | 0.431 a | 0.511 a | 1250.673 a | 2124.308 a | 33929.913 ab | 0.952 |
| pH | *I* | 0.259 a | - | 0.244 a | - | 1779.113 d | 0.848 |
| *A2* | 0.297 a | - | 0.257 a | - | 1915.228 c | 0.830 |
| *A4* | 0.285 a | - | 0.126 a | - | 1913.775 c | 0.807 |
| *G2* | 0.268 a | - | 0.253 a | - | 1951.383 b | 0.811 |
| *G4* | 0.269 a | - | 0.259 a | - | 1966.891 ab | 0.804 |
| *Gr* | 0.271 a | - | 0.256 a | - | 1979.624 a | 0.807 |
| Fruit Scar | *I* | 0.341 b | 0.380 a | 0.236 a | 0.424 a | 2505.509 bc | 1.034 |
| *A2* | 0.434 a | 0.452 a | 0.113 a | 0.416 a | 2496.282 bc | 0.936 |
| *A4* | 0.432 a | 0.45 a | 0.112 a | 0.181 a | 2520.767 b | 0.933 |
| *G2* | 0.475 a | 0.464 a | 0.160 a | 0.197 a | 2458.018 c | 0.952 |
| *G4* | 0.479 a | 0.464 a | 0.160 a | 0.199 a | 2524.347 b | 0.916 |
| *Gr* | 0.488 a | 0.466 a | 0.171 a | 0.184 a | 2610.849 a | 0.880 |
| Fruit Weight | *I* | 0.345 b | 0.363 a | 0.502 a | 0.337 a | 6076.956 b | 1.100 |
| *A2* | 0.403 ab | 0.405 a | 0.529 a | 0.391 a | 5943.302 cd | 0.926 |
| *A4* | 0.403 ab | 0.400 a | 0.404 a | 1.100 a | 5917.202 de | 0.928 |
| *G2* | 0.455 a | 0.438 a | 1.030 a | 0.615 a | 5899.15 e | 0.929 |
| *G4* | 0.453 a | 0.434 a | 1.059 a | 0.630 a | 5975.529 c | 0.877 |
| *Gr* | 0.453 a | 0.430 a | 1.027 a | 0.702 a | 6118.296 a | 0.825 |
| Yield | *I* | 0.251 a | 0.312 b | 0.881 a | 1.221 a | 9020.821 b | 1.003 |
| *A2* | 0.312 a | 0.353 ab | 0.661 a | 1.214 a | 8956.793 bc | 0.924 |
| *A4* | 0.325 a | 0.348 ab | 0.638 a | 1.730 a | 8951.254 bc | 0.920 |
| *G2* | 0.335 a | 0.390 a | 1.191 a | 2.343 a | 8917.214 c | 0.939 |
| *G4* | 0.327 a | 0.389 a | 1.263 a | 2.308 a | 8989.818 bc | 0.902 |
| *Gr* | 0.324 a | 0.384 ab | 1.297 a | 2.294 a | 9135.865 a | 0.872 |

aLetters based on Tukey test performed considering estimations obtained from 10 independent runs of the full models with BGLR (equation 1). bBeta= slope of the regression between the predicted breeding values and the estimated eBLUEs.
